# Supplementary material
Source: PubMed Central journal article supplement (PMC5242324)
Supplement: NIHMS797302-supplement-Supplemental_Data.pdf [file NIHMS797302-supplement-Supplemental_Data.pdf]

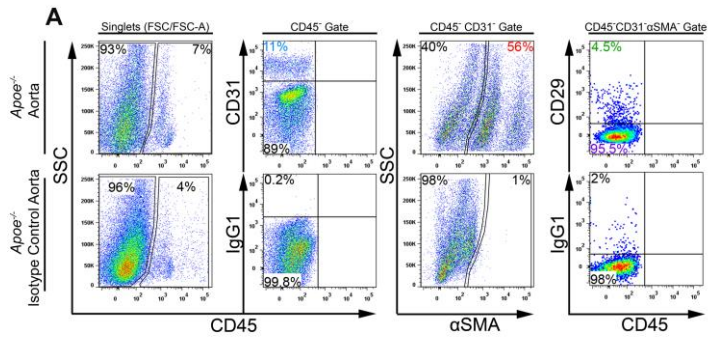

**Supplemental Figure I**

**Supplemental Figure I:** Aortic vascular cell flow cytometry gating scheme. Representative scheme for gating on vascular cell subsets for the flow cytometry experiments in Figure 1. Single CD45<sup>-</sup> vascular cells were gated and subdefined as follows: CD45<sup>-</sup>CD31<sup>+</sup>: endothelial cells, CD45<sup>-</sup>CD31<sup>-</sup>αSMA<sup>+</sup>: Smooth muscle cells, CD45<sup>-</sup>CD31<sup>-</sup> αSMA<sup>-</sup>CD29<sup>+</sup>: fibroblasts, CD45<sup>-</sup>CD31<sup>-</sup> αSMA<sup>-</sup>CD29<sup>-</sup>: remaining vascular cells.

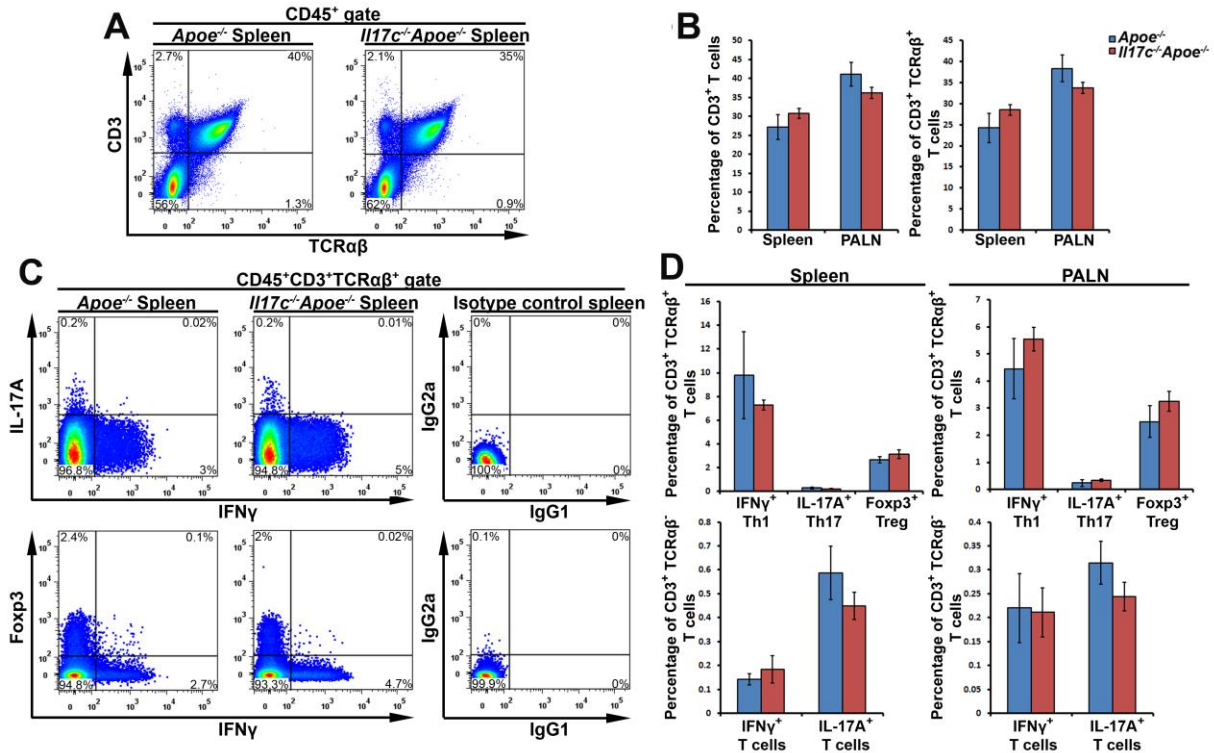

**Supplemental Fig. II**

**Supplemental Figure II: Peripheral T cells and T cell subsets are not impacted by IL-17C deficient conditions.**

(A-D) 12 week WD *Apoe<sup>-/-</sup>* and *Il17c<sup>-/-</sup>Apoe<sup>-/-</sup>* spleens and peri-aortic lymph nodes were stained with anti-CD45, CD3, TCRαβ, IL-17A, IFNγ, and Foxp3 antibodies or appropriate isotype controls, and assessed via flow cytometry. (A) Representative CD3 and TCRαβ staining of *Apoe<sup>-/-</sup>* and *Il17c<sup>-/-</sup>Apoe<sup>-/-</sup>* splenocytes. (B) Quantification of the percentage of splenic and peri-aortic lymph node CD3<sup>+</sup> T cells and CD3<sup>+</sup>TCRαβ<sup>+</sup> T cells. (C) Representative IL-17A, IFNγ, and Foxp3 staining within *Apoe<sup>-/-</sup>* and *Il17c<sup>-/-</sup>Apoe<sup>-/-</sup>* splenic CD3<sup>+</sup>TCRαβ<sup>+</sup> T cells. (D) Quantification of the percentage of splenic and peri-aortic lymph node Th1, Th17, Treg, CD3+ TCRγδ<sup>+</sup> IL-17A<sup>+</sup> T cell and CD3+ TCRγδ<sup>+</sup> IFNγ<sup>+</sup> T cell contents. Red – *Apoe<sup>-/-</sup>*, Blue – *Il17c<sup>-/-</sup>Apoe<sup>-/-</sup>* mice. n=7-11 mice/genotype, 4 independent experiments, bars depict means±SEM.
